# Supplementary material for: Insomnia, Pre-Sleep Arousal, Psychosocial Factors and Changes in Sleep Pattern during the Second Wave Lockdown of the COVID-19 Pandemic in Georgia
Source: MDPI journal article supplement (doi:10.3390/brainsci12010017), 2021-12-24
Supplement: s1 [file s1]

Table S1. Pearson's and Spearman's correlations between all the study variables

| Variables                      | 1. | 2.    | 3.      | 4.         | 5.         | 6.    | 7.     | 8.         | 9.         | 10.        | 11.        | 12.        | 13.        | 14.        | 15.        | 16.        | 17.        |
|--------------------------------|----|-------|---------|------------|------------|-------|--------|------------|------------|------------|------------|------------|------------|------------|------------|------------|------------|
| 1. Age                         |    | -0.05 | -0.38** | -0.55**    | -0.29**    | -0.04 | 0.22*  | -0.06      | -0.13**    | -0.05      | -0.11**    | -0.27**    | -0.11**    | -0.26**    | -0.13**    | -0.15**    | -0.31**    |
| 2. Sex                         |    |       | -0.03   | 0.04       | -0.03      | 0.04  | -0.02  | -0.07*     | -0.01      | 0.01       | -0.04      | -0.09**    | -0.17**    | -0.14**    | -0.12**    | -0.09**    | -0.08**    |
| 3. Marital status              |    |       |         | 0.30*<br>* | 0.11*<br>* | 0.05  | -0.04  | -0.03      | 0.01       | -0.02      | 0.07*      | 0.11*<br>* | 0.03       | 0.14*<br>* | 0.07*      | 0.05       | 0.13*<br>* |
| 4. Education                   |    |       |         |            | 0.38*<br>* | 0.01  | -0.07* | 0.07*      | 0.08*<br>* | 0.10*<br>* | 0.15*<br>* | 0.20*<br>* | 0.07*      | 0.18*<br>* | 0.09*<br>* | 0.18*<br>* | 0.20*<br>* |
| 5. Employment                  |    |       |         |            |            | 0.07* | -0.01  | 0.11*<br>* | 0.07*      | 0.11*<br>* | 0.12*<br>* | 0.23*<br>* | 0.15*<br>* | 0.19*<br>* | 0.14*<br>* | 0.15*<br>* | 0.15*<br>* |
| 6. Economic status             |    |       |         |            |            |       | 0.04   | 0.04       | 0.13*<br>* | 0.06       | 0.05       | 0.05       | 0.11*<br>* | 0.05       | 0.04       | 0.02       | 0.04       |
| 7. Chronic disease             |    |       |         |            |            |       |        | 0.04       | 0.04       | 0.05       | 0.04       | -0.04      | 0.01       | -0.01      | -0.02      | 0.08*<br>* | -0.03      |
| 8. COVID-19 infection          |    |       |         |            |            |       |        |            | 0.06       | 0.04       | 0.10*<br>* | 0.08*<br>* | 0.06*<br>* | 0.06*<br>* | -0.01      | 0.16*<br>* | 0.10*<br>* |
| 9. Family environment          |    |       |         |            |            |       |        |            |            | 0.21*<br>* | 0.23*<br>* | 0.24*<br>* | 0.26*<br>* | 0.30*<br>* | 0.19*<br>* | 0.22*<br>* | 0.20*<br>* |
| 10. Access to medical services |    |       |         |            |            |       |        |            |            |            | 0.17*<br>* | 0.16*<br>* | 0.15*<br>* | 0.16*<br>* | 0.10*<br>* | 0.19*<br>* | 0.13*<br>* |
| 11. ISI                        |    |       |         |            |            |       |        |            |            |            |            | 0.41*<br>* | 0.36*<br>* | 0.43*<br>* | 0.24*<br>* | 0.52*<br>* | 0.61*<br>* |
| 12. PSS-4                      |    |       |         |            |            |       |        |            |            |            |            |            | 0.33*<br>* | 0.48*<br>* | 0.21*<br>* | 0.41*<br>* | 0.49*<br>* |
| 13. Anxiety                    |    |       |         |            |            |       |        |            |            |            |            |            |            | 0.63*<br>* | 0.41*<br>* | 0.38*<br>* | 0.42*<br>* |

|                      |       |       |       |
|----------------------|-------|-------|-------|
| 14. Depression       | 0.43* | 0.42* | 0.47* |
|                      | *     | *     | *     |
| 15. Social isolation |       | 0.19* | 0.29* |
|                      |       | *     | *     |
| 16. PSAS-Somatic     |       |       | 0.61* |
|                      |       |       | *     |
| 17. PSAS-Cognitive   |       |       |       |

\* $p < 0.05$ ; \*\*  $p < 0.01$
